# Supplementary material for: Structure and dynamics of the EGFR/HER2 heterodimer
Source: PubMed Central journal article supplement (PMC9925823; doi:10.1038/s41421-023-00523-5), 2023-02-13
Supplement: 41421_2023_523_MOESM1_ESM.pdf [file 41421_2023_523_MOESM1_ESM.pdf]

# Supplementary Information for

## Structure and dynamics of the EGFR/HER2 heterodimer

### Authors:

Xue Bai<sup>1#</sup>, Pengyu Sun<sup>2,3#</sup>, Xinghao Wang<sup>2,3#</sup>, Changkun Long<sup>1#</sup>, Shuyun Liao<sup>4#</sup>, Song Dang<sup>2</sup>, Shangshang Zhuang<sup>2,3</sup>, Yongtao Du<sup>2,3</sup>, Xinyi Zhang<sup>2,3</sup>, Nan Li<sup>2</sup>, Kangmin He<sup>2,3\*</sup>, and Zhe Zhang<sup>1,4\*</sup>

### Affiliations:

<sup>1</sup>State Key Laboratory of Membrane Biology, School of Life Sciences, Peking University, Beijing 100871, China

<sup>2</sup>State Key Laboratory of Molecular Developmental Biology, Institute of Genetics and Developmental Biology, Chinese Academy of Sciences, Beijing 100101, China

<sup>3</sup>University of Chinese Academy of Sciences, Beijing 100049, China

<sup>4</sup>Center for Life Sciences, Academy for Advanced Interdisciplinary Studies, Peking University, Beijing 100871, China

<sup>#</sup>These authors contributed equally

\*Correspondence should be addressed to zzhang01@pku.edu.cn (Z.Z.) or kmhe@genetics.ac.cn (K.H.).

### This file includes:

Supplementary Figures S1 to S8

Supplementary Table S1

Legends for Supplementary Videos S1 to S4

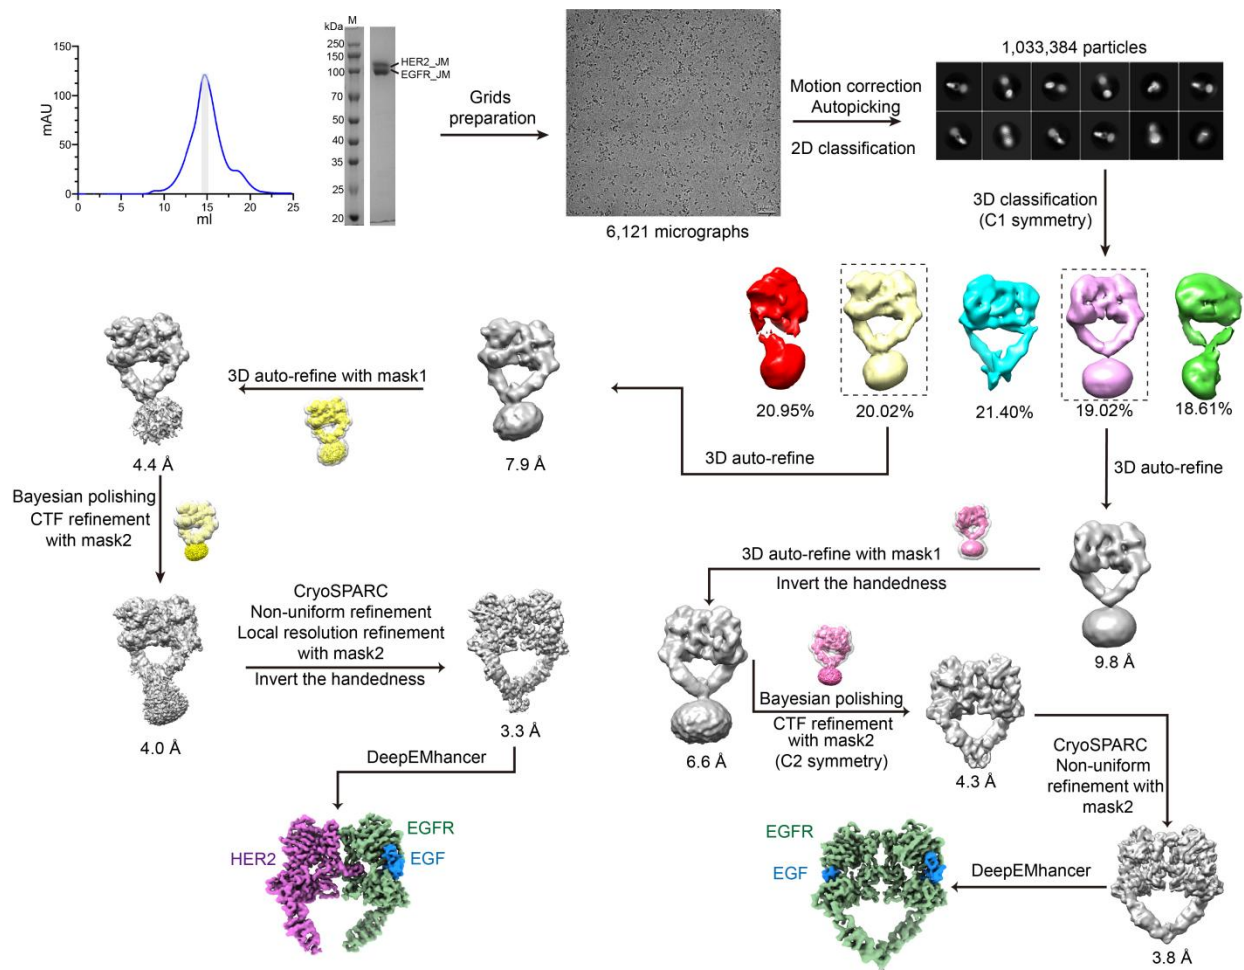

**Supplementary Fig. S1 Cryo-EM analyses of the EGFR-EGF/HER2 dataset.**

Workflow of the sample preparation and data processing of the EGFR-EGF/HER2 dataset.

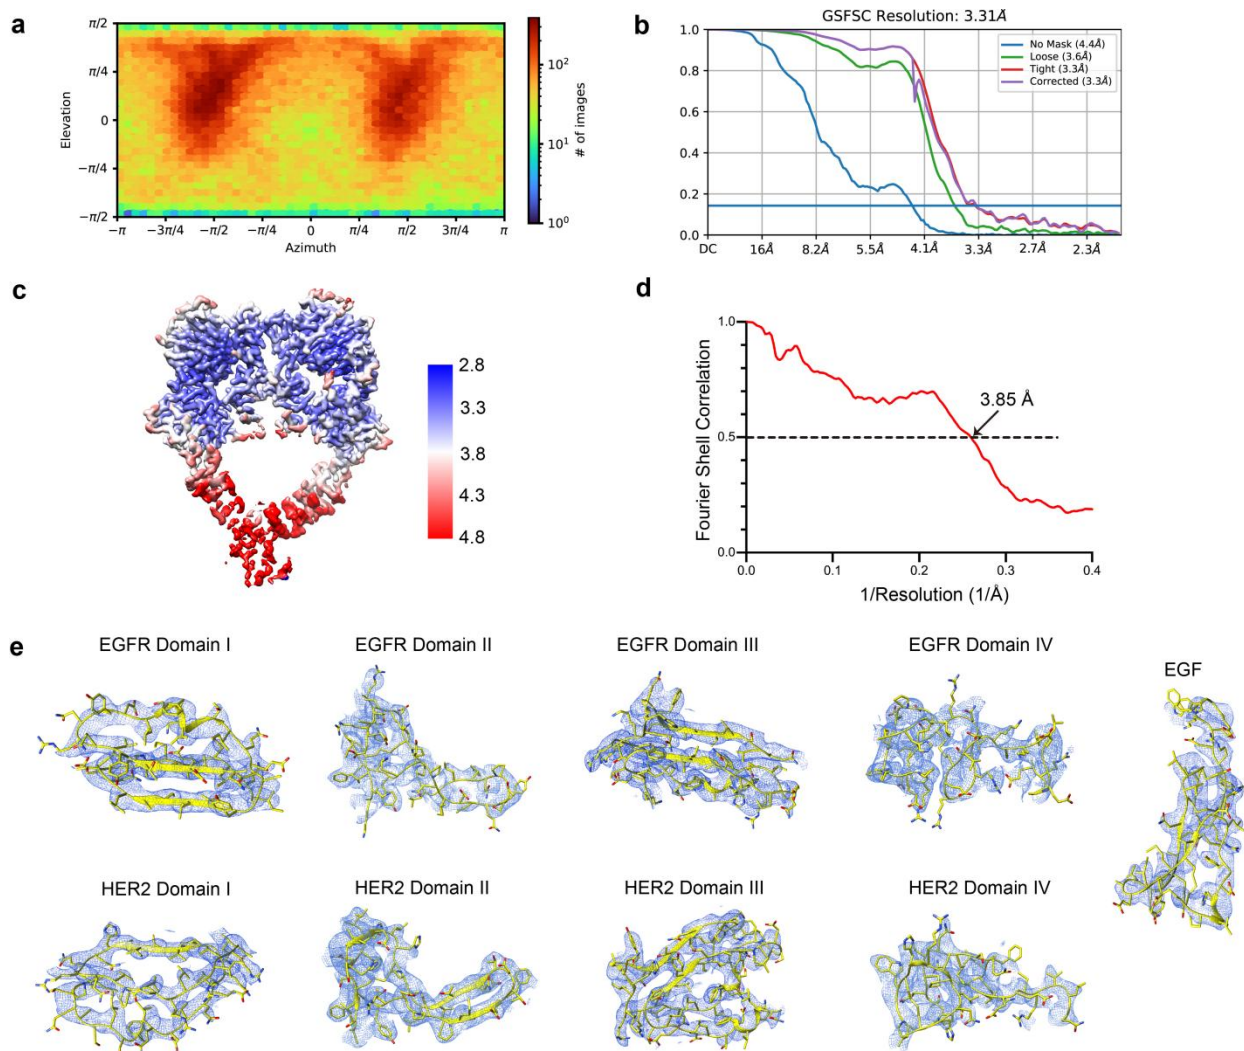

### Supplementary Fig. S2 Assessments of the EGFR-EGF/HER2 structure.

**a** Angular distribution of the particles used in the final reconstruction.

**b** Fourier shell correlation (FSC) curves between two half maps.

**c** Local resolution of the cryo-EM map.

**d** FSC curve calculated between cryo-EM map and structural model.

**e** Close-up view of the cryo-EM densities and fitted atomic models for representative regions of the structure.

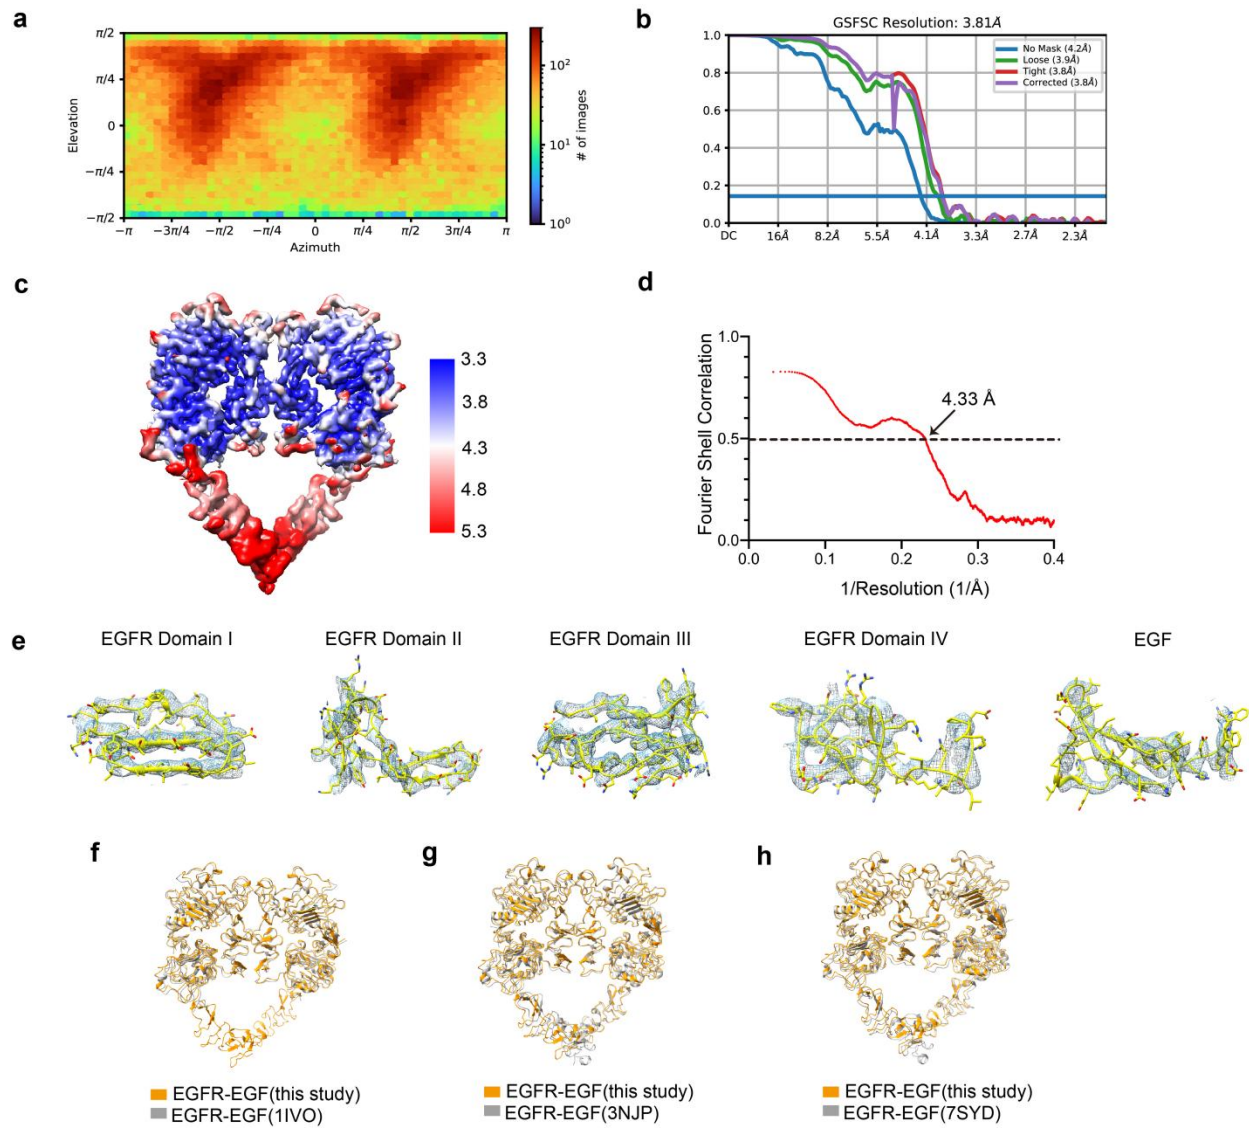

**Supplementary Fig. S3 Assessments of the EGFR-EGF homodimer structure.**

**a** Angular distribution of the particles used in the final reconstruction.

**b** Fourier shell correlation (FSC) curves between two half maps.

**c** Local resolution of the cryo-EM map.

**d** FSC curve calculated between cryo-EM map and structural model.

**e** Close-up view of the cryo-EM densities and fitted atomic models for representative regions of the structure.

**f-h** Superposition of our EGFR-EGF homodimer structure (golden) with the currently reported three structures (grey). The RMSDs between our structure and the others are 1.45 Å (PDB code 1IVO), 1.34 Å (PDB code 3NJP), and 1.44 Å (PDB code 7SYD), respectively.

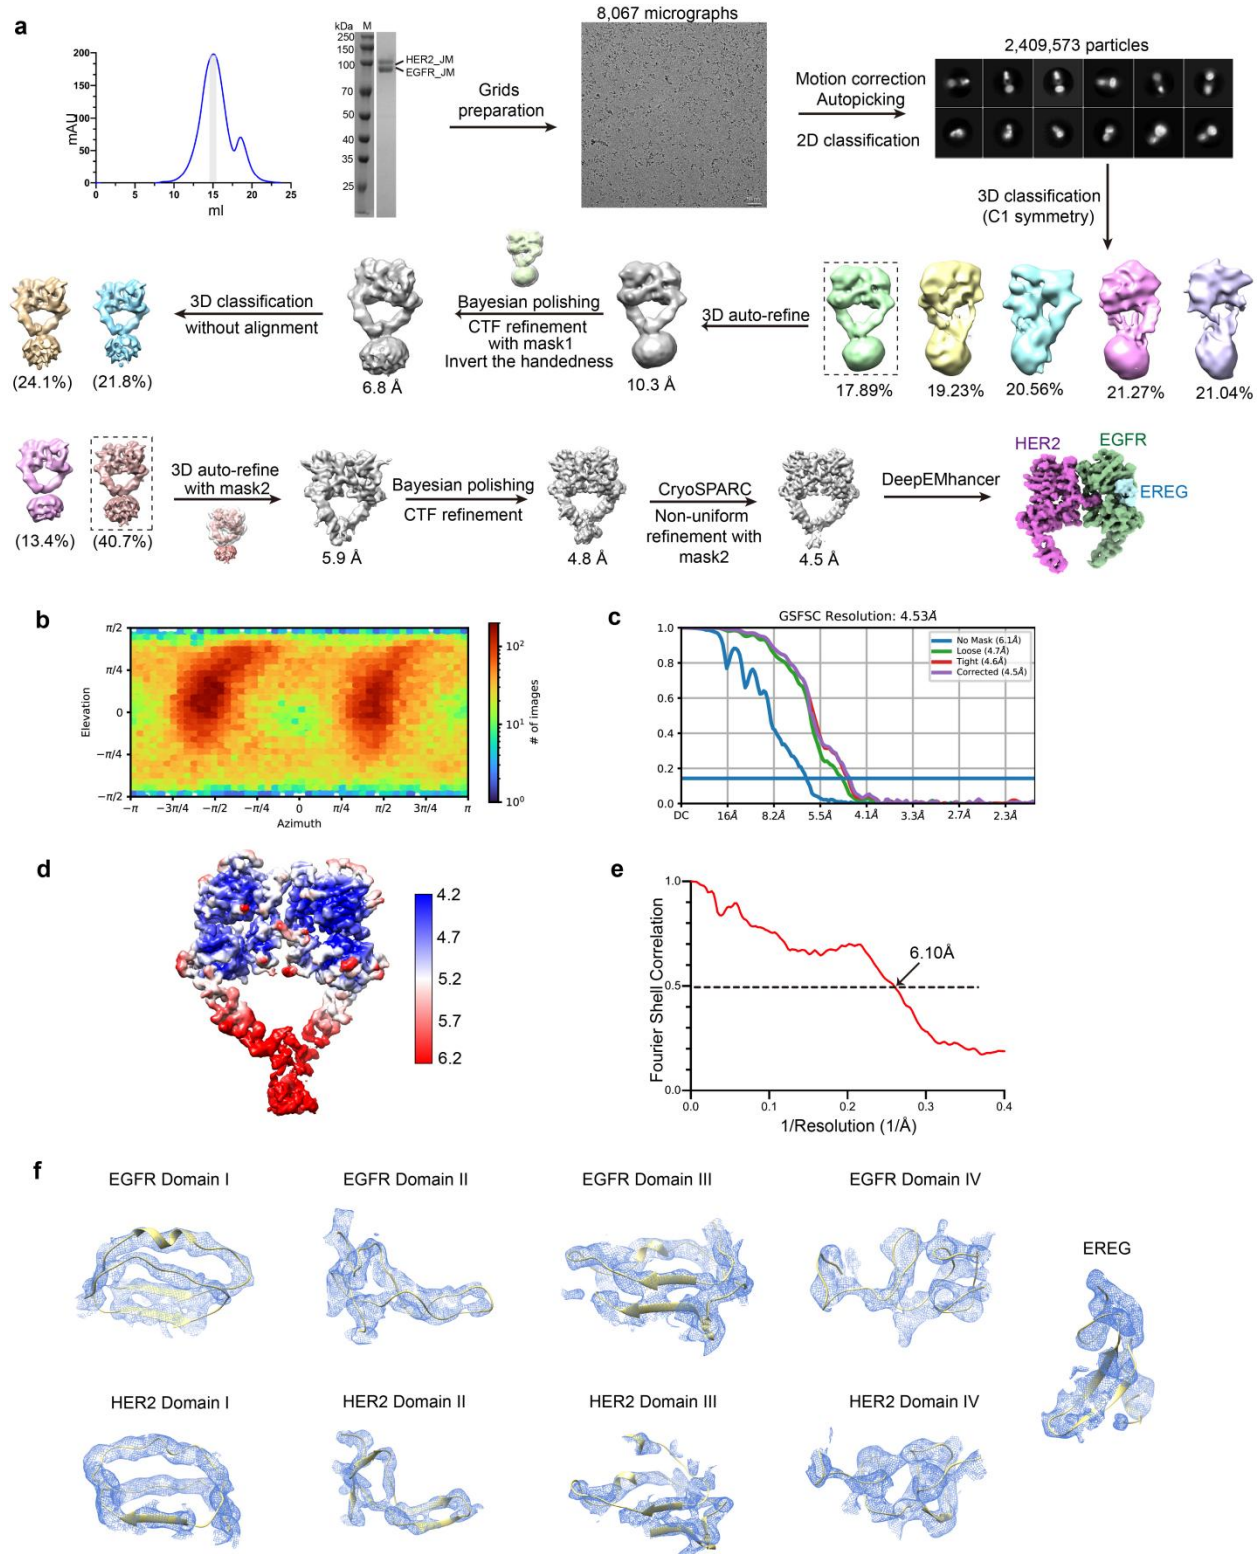

**Supplementary Fig. S4 Cryo-EM data processing of the EGFR-ERE/HER2 dataset.**

**a** Workflow of the data processing.

- b** Angular distribution of the particles used in the final reconstruction.
- c** Fourier shell correlation (FSC) curves between two half maps.
- d** Local resolution of the cryo-EM map.
- e** FSC curve calculated between cryo-EM map and structural model.
- f** Close-up view of the cryo-EM densities and fitted atomic models for representative regions of the structure.

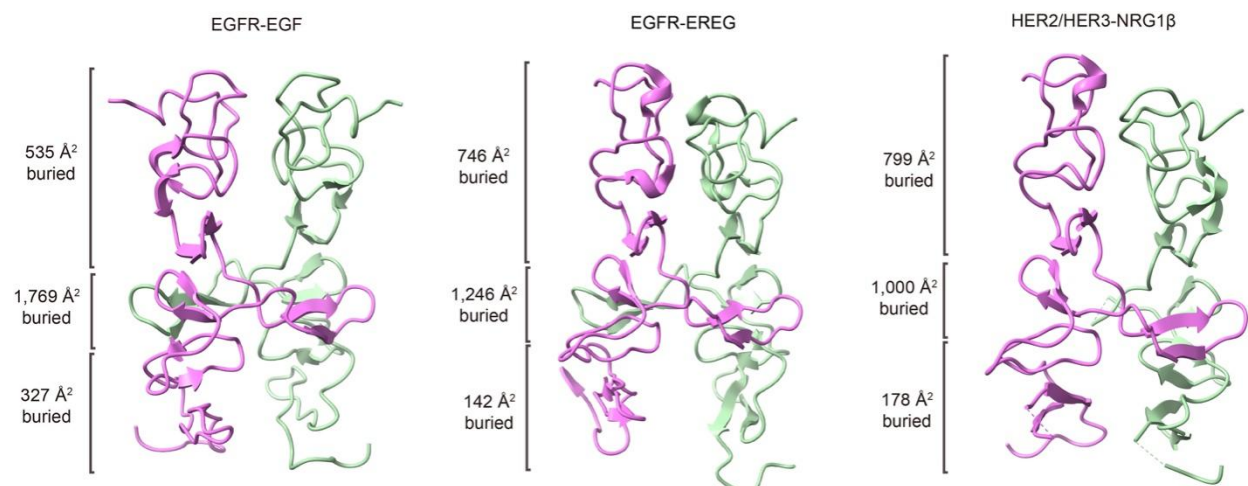

**Supplementary Fig. S5 Interaction details of Domain II in different human HER dimers.**

From left to right: EGFR-EGF (PDB code 1IVO), EGFR-EREG (PDB code 5WB7), and HER2/HER3-NRG-1β (PDB code 7MN5). The buried surface areas of the dimerization arms, and the N- and C-terminal regions are calculated and indicated separately.



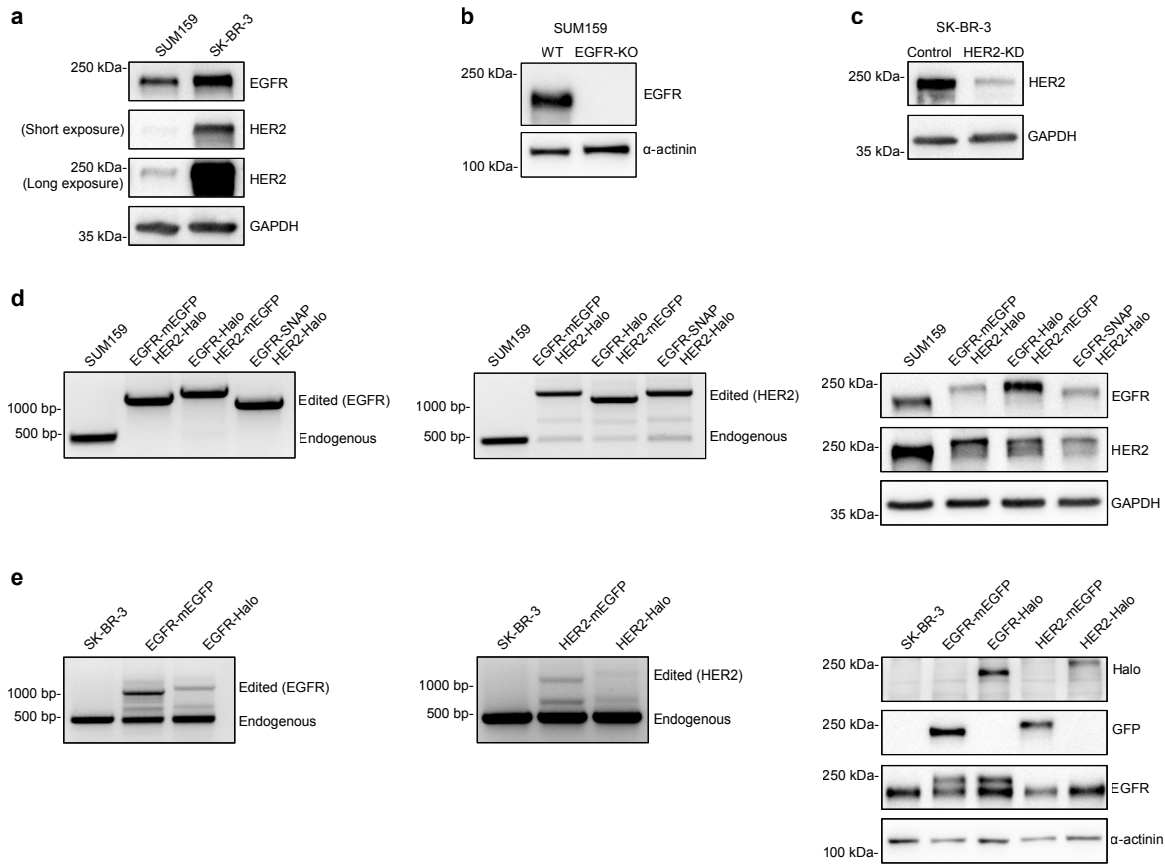

### Supplementary Fig. S6 Genome-editing of SUM159 and SK-BR-3 cells.

**a** Western blot analysis of the relative expression levels of EGFR and HER2 in SUM159 and SK-BR-3 cells.

**b** Loss of EGFR expression in a clonal SUM159 cell line knocked out of EGFR was confirmed by Western blot.

**c** Western blot analysis of SK-BR-3 cells treated with control siRNA or siRNA specific for HER2.

**d** Genomic PCR analysis showing the integration of mEGFP, HaloTag, or SNAP-tag to the EGFR or HER2 genomic locus of SUM159 cells to generate three genome-edited cell lines (pool) (left and middle panels). Western blot analysis of the cell lines was shown on the right.

e Genomic PCR analysis showing the integration of mEGFP or HaloTag to the EGFR or HER2 genomic locus of SK-BR-3 cells to generate four genome-edited cell lines (pool) (left and middle panels). Western blot analysis of the cell lines was shown on the right.

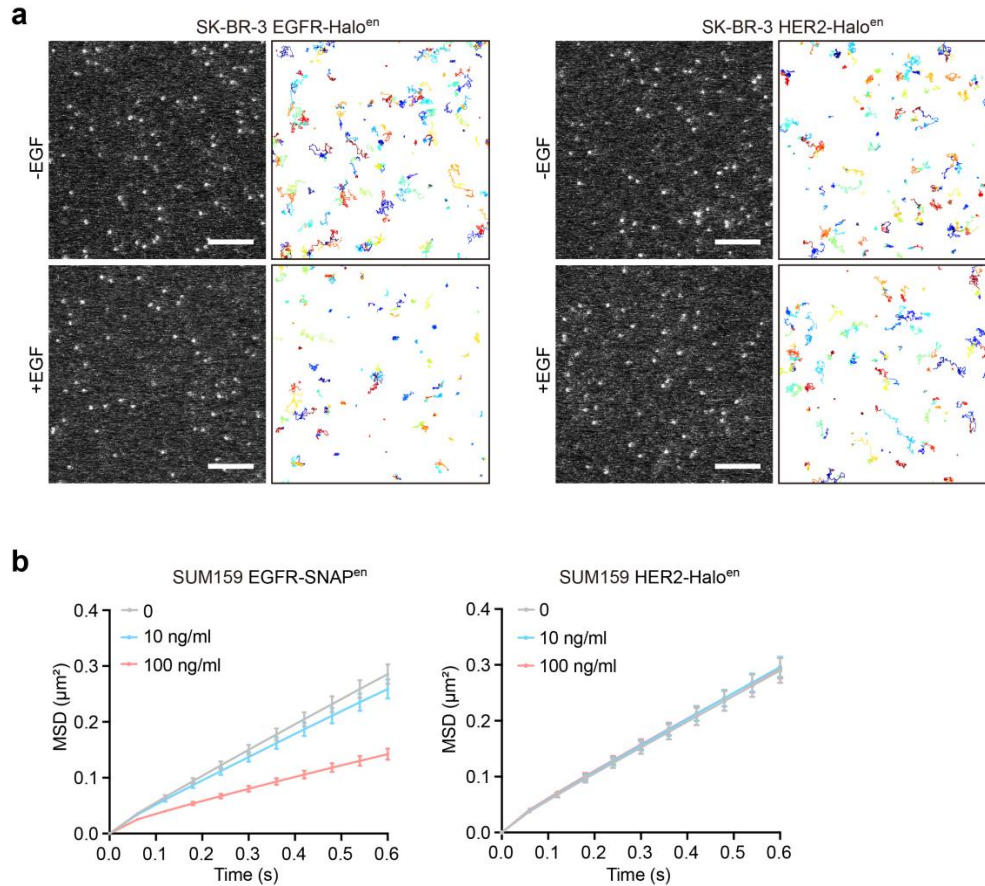

### Supplementary Fig. S7 Diffusion dynamics of EGFR and HER2.

**a** Live-cell single-molecule imaging and tracking of endogenous EGFR-Halo and HER2-Halo molecules at the plasma membrane of SK-BR-3 cells genome-edited for EGFR-Halo or HER2-Halo (labeled by JFX<sub>650</sub>-HaloTag ligand). Shown are representative single frames and tracking traces of time-lapse series acquired in the cells treated without or with EGF (100 ng/mL) by TIRF microscopy. Scale bars, 5  $\mu\text{m}$ .

**b** SUM159 cells genome-edited for both EGFR-SNAP and HER2-Halo were labeled by JFX<sub>650</sub>-SNAP-tag ligand and JFX<sub>549</sub>-HaloTag ligand, treated with 0, 10, or 100 ng/mL EGF, and then imaged by TIRF microscopy. Shown are MSD- $\Delta t$  plots of EGFR-SNAP tracks (left pane) or HER2-Halo tracks (right pane) ( $n = 57, 62,$  and  $63$  cells). Error bars show mean  $\pm$  95% confidence interval.

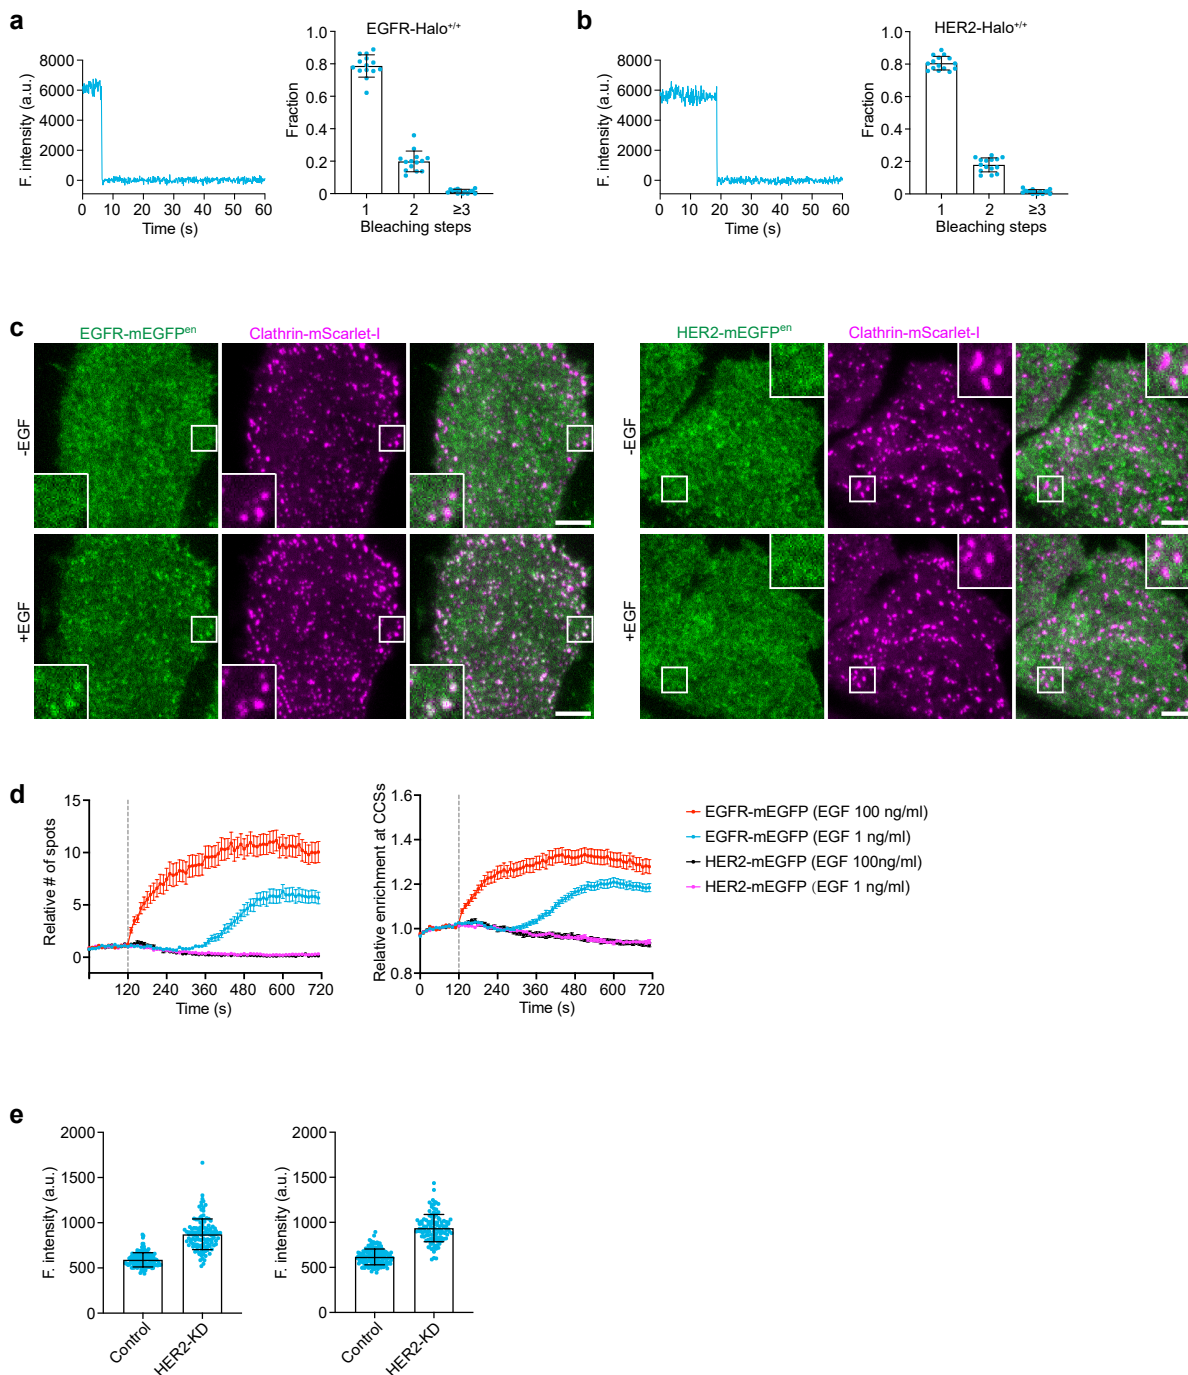

**Supplementary Fig. S8 Comparison of EGFR and HER2 endocytosis.**

**a, b** SUM159 cells genome-edited to express EGFR-Halo<sup>+/+</sup> or HER2-Halo<sup>+/+</sup> were labeled by JFX<sub>650</sub>-HaloTag ligand, fixed, and then imaged by continuous TIRF illumination with high laser power. Shown are the fluorescence intensity trace of a single EGFR-Halo/HER2-Halo spot (single-

step bleaching with background subtracted) and the fraction of bleaching steps of single EGFR-Halo (**a**) and HER2-Halo (**b**) spots ( $n = 14$  and  $15$  cells, mean  $\pm$  SD).

**c** SK-BR-3 cells genome-edited for EGFR-mEGFP (left panel) or HER2-mEGFP (right panel) were stably expressed with clathrin-mScarlet-I and imaged at the bottom surfaces by TIRF microscopy. Shown are the single frames before and 3 min after EGF treatment ( $1 \text{ ng/mL}$ ) during the continuous time-lapse imaging. Boxed regions are enlarged and shown. Scale bars,  $5 \text{ }\mu\text{m}$ .

**d** SK-BR-3 cells genome-edited for EGFR-mEGFP or HER2-mEGFP were stably expressed with clathrin-mScarlet-I and imaged at the bottom surfaces by TIRF microscopy. EGF ( $1 \text{ ng/mL}$  or  $100 \text{ ng/mL}$ ) was added at 120 s of the time-lapse imaging. The relative numbers of fluorescence spots of EGFR-mEGFP or HER2-mEGFP that appeared at the plasma membrane (left panel,  $n = 30, 37, 37,$  and  $41$  cells, mean  $\pm$  SEM) and the relative enrichment of EGFR-mEGFP or HER2-mEGFP fluorescence in clathrin-coated structures (CCSs, right panel,  $n = 30, 37, 23,$  and  $37$  cells, mean  $\pm$  SEM) during EGF stimulation are shown. The continuous imaging caused slight photobleaching of HER2-mEGFP at the plasma membrane.

**e** SK-BR-3 cells were treated with control siRNA or siRNA targeting HER2 (HER2-KD), and then incubated with Alexa Fluor 488 conjugated EGF for 10 min (left panel) or 15 min (right panel), fixed and then imaged by spinning-disk confocal microscopy (Z stack spaced at  $0.35 \text{ }\mu\text{m}$ ). The fluorescence intensity of Alexa Fluor 488 conjugated EGF in the control and HER2-KD cells were measured and shown (10 min: 137 control and 127 KD cells; 15 min: 150 control and 118 KD cells; mean  $\pm$  SD).

**Supplementary Table S1 Cryo-EM data collection, refinement, and validation statistics.**

|                                                     | EGFR-EGF/HER2<br>(EMD-34744)<br>(PDB 8HGO) | EGFR-EREG/HER2<br>(EMD-34745)<br>(PDB 8HGP) | EGFR-EGF dimer<br>(EMD-34746)<br>(PDB 8HGS) |
|-----------------------------------------------------|--------------------------------------------|---------------------------------------------|---------------------------------------------|
| <b>Data collection and processing</b>               |                                            |                                             |                                             |
| Magnification                                       | 81,000                                     | 81,000                                      | 81,000                                      |
| Voltage (kV)                                        | 300                                        | 300                                         | 300                                         |
| Electron exposure (e <sup>-</sup> /Å <sup>2</sup> ) | 60.8                                       | 60.8                                        | 60.8                                        |
| Defocus range (μm)                                  | 1.2-1.5                                    | 1.2-1.5                                     | 1.2-1.5                                     |
| Pixel size (Å)                                      | 1.07                                       | 1.07                                        | 1.07                                        |
| Symmetry imposed                                    | C1                                         | C1                                          | C2                                          |
| Initial particle images (no.)                       | 1,990,190                                  | 2,409,573                                   | 1,990,190                                   |
| Final particle images (no.)                         | 207,092                                    | 273,388                                     | 196,557                                     |
| Map resolution (Å)                                  | 3.31                                       | 4.53                                        | 3.81                                        |
| FSC threshold                                       | 0.143                                      | 0.143                                       | 0.143                                       |
| Map resolution range (Å)                            | 2.3-15                                     | 2.9-15                                      | 3.2-15                                      |
| <b>Refinement</b>                                   |                                            |                                             |                                             |
| Initial model used (PDB code)                       | 7MN5/1I1VO                                 | 7MN5/5WB7                                   | 7SYD                                        |
| Model resolution (Å)                                | 3.85                                       | 6.10                                        | 4.33                                        |
| FSC threshold                                       | 0.5                                        | 0.5                                         | 0.5                                         |
| Model resolution range (Å)                          | -                                          | -                                           | -                                           |
| Map sharpening <i>B</i> factor (Å <sup>2</sup> )    | -                                          | -                                           | -                                           |
| Model composition                                   |                                            |                                             |                                             |
| Non-hydrogen atoms                                  | 9,227                                      | 9,169                                       | 10,080                                      |
| Protein residues                                    | 1,178                                      | 1,172                                       | 1,280                                       |
| Ligands                                             | -                                          | -                                           | -                                           |
| <i>B</i> factors (Å <sup>2</sup> )                  |                                            |                                             |                                             |
| Protein                                             | 78.79                                      | 185.39                                      | 111.68                                      |
| Ligand                                              | -                                          | -                                           | -                                           |
| R.m.s. deviations                                   |                                            |                                             |                                             |
| Bond lengths (Å)                                    | 0.003                                      | 0.003                                       | 0.003                                       |
| Bond angles (°)                                     | 0.702                                      | 0.670                                       | 0.732                                       |
| Validation                                          |                                            |                                             |                                             |
| MolProbity score                                    | 1.72                                       | 1.69                                        | 1.61                                        |
| Clashscore                                          | 4.51                                       | 3.98                                        | 3.29                                        |
| Poor rotamers (%)                                   | 0.00                                       | 0.20                                        | 0.00                                        |
| Ramachandran plot                                   |                                            |                                             |                                             |
| Favored (%)                                         | 91.80                                      | 91.49                                       | 91.90                                       |
| Allowed (%)                                         | 8.03                                       | 8.51                                        | 8.10                                        |
| Disallowed (%)                                      | 0.17                                       | 0.00                                        | 0.00                                        |

**Supplementary Video S1 Live-cell single-molecule imaging and tracking of endogenous EGFR-Halo at the plasma membrane of SUM159 cells treated without or with EGF (100 ng/mL) and imaged by TIRF microscopy.**

**Supplementary Video S2 Live-cell single-molecule imaging and tracking of endogenous HER2-Halo at the plasma membrane of SUM159 cells treated without or with EGF (100 ng/mL) and imaged by TIRF microscopy.**

**Supplementary Video S3 Live-cell single-molecule imaging and tracking of endogenous EGFR-Halo at the plasma membrane of SK-BR-3 cells treated without or with EGF (100 ng/mL) and imaged by TIRF microscopy.**

**Supplementary Video S4 Live-cell single-molecule imaging and tracking of endogenous HER2-Halo at the plasma membrane of SK-BR-3 cells treated without or with EGF (100 ng/mL) and imaged by TIRF microscopy.**
